# Supplementary material for: Identification of Five Driver Gene Mutations in Patients with Treatment-Naïve Lung Adenocarcinoma in Taiwan
Source: PubMed Central journal article supplement (PMC4366385; doi:10.1371/journal.pone.0120852), 2015-03-19
Supplement: pone.0120852.s001.pdf [file pone.0120852.s001.pdf]

Table S1. Sequence of PCR Primers and MassARRAY Probes

| Probe ID          | Targeted Mutation Site                                | Sequence (5'→3')                |
|-------------------|-------------------------------------------------------|---------------------------------|
| <b>PCR primer</b> |                                                       |                                 |
| BRAF_PCRF         | BRAF c.1799T>A, p.(Val600Glu)                         | ACGTTGGATGTCCTTCATGAAGACCTCACAG |
| BRAF_PCRR         | BRAF c.1799T>A, p.(Val600Glu)                         | ACGTTGGATGTTCAAACCTGATGGGACCCAC |
| KRAS_PCRF         | KRAS c.34G>A, p.(Gly12Ser)                            | ACGTTGGATGTAGCTGTATCGTCAAGGCAC  |
|                   | KRAS c.34G>C, p.(Gly12Arg)                            |                                 |
|                   | KRAS c.34G>T, p.(Gly12Cys)                            |                                 |
|                   | KRAS c.35G>A, p.(Gly12Asp)                            |                                 |
|                   | KRAS c.35G>C, p.(Gly12Ala)                            |                                 |
|                   | KRAS c.35G>T, p.(Gly12Val)                            |                                 |
|                   | KRAS c.37G>A, p.(Gly13Ser)                            |                                 |
|                   | KRAS c.37G>T, p.(Gly13Cys)                            |                                 |
|                   | KRAS c.37G>C, p.(Gly13Arg)                            |                                 |
|                   | KRAS c.38G>A, p.(Gly13Asp)                            |                                 |
| KRAS_PCRR         | KRAS c.38G>T, p.(Gly13Ala)                            | ACGTTGGATGACTTGTGGTAGTTGGAGCTG  |
|                   | KRAS c.38G>C, p.(Gly13Val)                            |                                 |
|                   | KRAS c.34G>A, p.(Gly12Ser)                            |                                 |
|                   | KRAS c.34G>C, p.(Gly12Arg)                            |                                 |
|                   | KRAS c.34G>T, p.(Gly12Cys)                            |                                 |
|                   | KRAS c.35G>A, p.(Gly12Asp)                            |                                 |
|                   | KRAS c.35G>C, p.(Gly12Ala)                            |                                 |
|                   | KRAS c.35G>T, p.(Gly12Val)                            |                                 |
|                   | KRAS c.37G>A, p.(Gly13Ser)                            |                                 |
|                   | KRAS c.37G>T, p.(Gly13Cys)                            |                                 |
| HER2_PCRF         | HER2 c.2325_2326>TATACGTGATGGCG, p.(A775_G776insYVMA) | ACGTTGGATGAGAAGCGGGAGACATATGG   |
|                   | HER2 c.2325_2326>TATACGTGATGGCG, p.(A775_G776insYVMA) |                                 |
| HER2_PCRR         | HER2 c.2325_2326>TATACGTGATGGCG, p.(A775_G776insYVMA) | ACGTTGGATGTACCCTTGTCCCCAGGAAG   |
| EGFR_ex18_PCRF    | EGFR c.2126A>C, p.(Glu709Ala)                         | ACGTTGGATGTTATACACCGTGCCGAACGC  |
|                   | EGFR c.2126A>G, p.(Glu709Gly)                         |                                 |
|                   | EGFR c.2126A>T, p.(Glu709Val)                         |                                 |
|                   | EGFR c.2156G>C, p.(Gly719Ala)                         |                                 |
|                   | EGFR c.2156G>A, p.(Gly719Asn)                         |                                 |
|                   | EGFR c.2155G>A, p.(Gly719Ser)                         |                                 |
| EGFR_ex18_PCRR    | EGFR c.2155G>T, p.(Gly719Cys)                         | ACGTTGGATGACCAAGCTCTCTTGAGGATC  |
|                   | EGFR c.2126A>C, p.(Glu709Ala)                         |                                 |
|                   | EGFR c.2126A>G, p.(Glu709Gly)                         |                                 |
|                   | EGFR c.2126A>T, p.(Glu709Val)                         |                                 |
|                   | EGFR c.2156G>C, p.(Gly719Ala)                         |                                 |
|                   | EGFR c.2156G>A, p.(Gly719Asn)                         |                                 |
| EGFR_ex19_PCRF    | EGFR c.2155G>A, p.(Gly719Ser)                         | ACGTTGGATGAGCAGAACTCACATCGAGG   |
|                   | EGFR c.2155G>T, p.(Gly719Cys)                         |                                 |
|                   | EGFR c.2235_2249del15, p.(E746-A750del)               |                                 |
|                   | EGFR c.2236_2250del15, p.(E746-A750del)               |                                 |
|                   | EGFR c.2237_2251del15, p.(E746-T751>A)                |                                 |
|                   | EGFR c.2237_2244>T, p.(E746-S752>V)                   |                                 |
|                   | EGFR c.2239_2248>C, p.(L747-E750>P)                   |                                 |
|                   | EGFR c.2239_2251>C, p.(L747-T751>P)                   |                                 |
|                   | EGFR c.2239_2256del18, p.(L747-S752del)               |                                 |
|                   | EGFR c.2240_2254del15, p.L747-T751del)                |                                 |
|                   | EGFR c.2240_2257del19, p.(L747-P753>S)                |                                 |
|                   | EGFR c.2235_2252>AAT, p.(E746-T751>I)                 |                                 |
|                   | EGFR c.2236_2253del18, p.(E746-T751del)               |                                 |
|                   | EGFR c.2237_2254del18, p.(E746-S752>A)                |                                 |
|                   | EGFR c.2238_2255del18, p.(E746-S752>D)                |                                 |
| EGFR_ex19_PCRR    | EGFR c.2238_2248>GC, p.(L747-A750>P)                  | ACGTTGGATGGATCCAGAAAGGTGAGAAAAG |
|                   | EGFR c.2238_2252>GCA, p.(L747-T751>Q)                 |                                 |
|                   | EGFR c.2239_2247del9, p.(L747-E749del)                |                                 |
|                   | EGFR c.2239_2253del15, p.(L747-T751del)               |                                 |
|                   | EGFR c.2239_2258>CA, p.(L747-P753>Q)                  |                                 |
|                   | EGFR c.2240_2251del12, p.(L747-T751>S)                |                                 |
|                   | EGFR c.2235_2249del15, p.(E746-A750del)               |                                 |
|                   | EGFR c.2236_2250del15, p.(E746-A750del)               |                                 |
|                   | EGFR c.2237_2251del15, p.(E746-T751>A)                |                                 |
|                   | EGFR c.2237_2244>T, p.(E746-S752>V)                   |                                 |
|                   | EGFR c.2239_2248>C, p.(L747-E750>P)                   |                                 |
|                   | EGFR c.2239_2251>C, p.(L747-T751>P)                   |                                 |
|                   | EGFR c.2239_2256del18, p.(L747-S752del)               |                                 |
|                   | EGFR c.2240_2254del15, p.L747-T751del)                |                                 |
|                   | EGFR c.2240_2257del19, p.(L747-P753>S)                |                                 |

|                |                                                                                                                                                                     |                                     |
|----------------|---------------------------------------------------------------------------------------------------------------------------------------------------------------------|-------------------------------------|
|                | EGFR c.2239_2247del9, p.(L747-E749del)<br>EGFR c.2239_2253del15, p.(L747-T751del)<br>EGFR c.2239_2258>CA, p.(L747-P753>Q)<br>EGFR c.2240_2251del12, p.(L747-T751>S) |                                     |
| EGFR_ex20_PCRF | EGFR c.2303G>T, p.(Ser768Ile)<br>EGFR c.2369C>T, p.(Thr790Met)                                                                                                      | ACGTTGGATGTGTTCCCGGACATAGTCCAG      |
| EGFR_ex20_PCRR | EGFR c.2303G>T, p.(Ser768Ile)<br>EGFR c.2369C>T, p.(Thr790Met)                                                                                                      | ACGTTGGATGATCTGCCTCACCTCCACCGT      |
| EGFR_ex21_PCRF | EGFR c.2573T>G, p.(Leu858Arg)<br>EGFR c.2573T>A, p.(Ler858Gln)<br>c.2582T>A, p.(Leu861Gln)                                                                          | EGFR ACGTTGGATGCCTCCTTCTGCATGGTATTC |
| EGFR_ex21_PCRR | EGFR c.2573T>G, p.(Leu858Arg)<br>EGFR c.2573T>A, p.(Ler858Gln)<br>c.2582T>A, p.(Leu861Gln)                                                                          | EGFR ACGTTGGATGGCAGCATGTCAAGATCACAG |
| <b>Probe</b>   |                                                                                                                                                                     |                                     |
| BRAF_1799      | BRAF c.1799T>A, p.(Val600Glu)                                                                                                                                       | CCACTCCATCGAGATTTTC                 |
| KRAS_215       | KRAS c.34G>A, p.(Gly12Ser)<br>KRAS c.34G>C, p.(Gly12Arg)<br>KRAS c.34G>T, p.(Gly12Cys)                                                                              | TAAACTTGTGGTAGTTGGAGCT              |
| KRAS_216       | KRAS c.35G>A, p.(Gly12Asp)<br>KRAS c.35G>C, p.(Gly12Ala)<br>KRAS c.35G>T, p.(Gly12Val)                                                                              | AGGCACTCTTGCCTACGCCA                |
| KRAS_218       | KRAS c.37G>A, p.(Gly13Ser)<br>KRAS c.37G>T, p.(Gly13Cys)<br>KRAS c.37G>C, p.(Gly13Arg)                                                                              | TCGTCAAGGCACTCTTGCCTACGC            |
| KRAS_219       | KRAS c.38G>A, p.(Gly13Asp)<br>KRAS c.38G>T, p.(Gly13Ala)<br>KRAS c.38G>C, p.(Gly13Val)                                                                              | GCCTCTTGCCTACG                      |
| HER2_2325      | HER2 c.2325_2326>TATACGTGATGGCG,<br>p.(A775_G776insYVMA)                                                                                                            | AGCATACGTGATGGC                     |
| HER2_2326      | HER2 c.2325_2326>TATACGTGATGGCG,<br>p.(A775_G776insYVMA)                                                                                                            | AAGCATACGTGATGGCT                   |
| EGFR_2126      | EGFR c.2126A>C, p.(Glu709Ala)<br>EGFR c.2126A>G, p.(Glu709Gly)<br>EGFR c.2126A>T, p.(Glu709Val)                                                                     | CAAGCTCTCTTGAGGATCTTGAAGG           |
| EGFR_2155      | EGFR c.2155G>A, p.(Gly719Ser)<br>EGFR c.2155G>T, p.(Gly719Cys)                                                                                                      | AATTCAAAAAGATCAAAGTGCTG             |
| EGFR_2156      | EGFR c.2156G>C, p.(Gly719Ala)<br>EGFR c.2156G>A, p.(Gly719Asn)                                                                                                      | GTGCCGAACGCACCGGAG                  |
| EGFR_del1      | EGFR c.2235_2249del15, p.(E746-A750del)                                                                                                                             | ATTCCCGTCGCTATCAA                   |
| EGFR_del2      | EGFR c.2236_2250del15, p.(E746-A750del)                                                                                                                             | ATTCCCGTCGCTATCAAG                  |
| EGFR_del3/4    | EGFR c.2237_2251del15, p.(E746-T751>A)<br>EGFR c.2237_2244>T, p.(E746-S752>V)                                                                                       | ATTCCCGTCGCTATCAAGG                 |
| EGFR_del5      | EGFR c.2239_2248>C, p.(L747-E750>P)                                                                                                                                 | GGCTTTCGGAGATGTTG                   |
| EGFR_del6      | EGFR c.2239_2251>C, p.(L747-T751>P)                                                                                                                                 | TTGTTGGCTTTCGGAGATG                 |
| EGFR_del7      | EGFR c.2239_2256del18, p.(L747-S752del)                                                                                                                             | CCTTGTTGGCTTTCGG                    |
| EGFR_del8      | EGFR c.2240_2254del15, p.(L747-T751del)                                                                                                                             | TCCTTGTTGGCTTTCGGAGAT               |
| EGFR_del9      | EGFR c.2240_2257del19, p.(L747-P753>S)                                                                                                                              | TCGAGGATTTCTTGTGGCTTTCG             |
| EGFR_del13     | EGFR c.2238_2255del18, p.(E746-S752>D)                                                                                                                              | AATTCCTCGCTATCAAGGA                 |
| EGFR_del16     | EGFR c.2239_2247del9, p.(L747-E749del)                                                                                                                              | AATTCCTCGCTATCAAGGAA                |
| EGFR_del17     | EGFR c.2239_2253del15, p.(L747-T751del)                                                                                                                             | AAATTCCTCGCTATCAAGGAAT              |
| EGFR_2303      | EGFR c.2303G>T, p.(Ser768Ile)                                                                                                                                       | GGCGGCACACGTGGGGGTTGTCCACG          |
| EGFR_2369      | EGFR c.2369C>T, p.(Thr790Met)                                                                                                                                       | TGCCTCACCTCCACCGTGCAGCTCATCA        |
| EGFR_2573      | EGFR c.2573T>G, p.(Leu858Arg)<br>EGFR c.2573T>A, p.(Ler858Gln)                                                                                                      | AAGATCACAGATTTTGGGC                 |
| EGFR_2582      | EGFR c.2582T>A, p.(Leu861Gln)                                                                                                                                       | TTCTTCTCTTCCGCACCCAGC               |
